# Supplementary material
Source: Springer Nature journal article supplement (https://www.springermedizin.de/resource/supplementary/13000_2011_416_MOESM1_ESM.pdf/9624518)

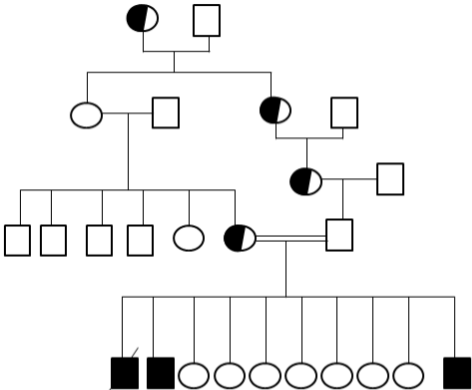

Patient 1 died  
at 7 years old

Patient 2

Patient 3

Supplement: MOESM1 [file 9624518]
